# Supplementary material
Source: ML conference proceedings conference paper supplement (https://aclanthology.org/D19-1445)
Supplement: Attachment [file D19-1445.Attachment.zip]

Archive with 25 entries (25 files):
- acl_natbib.bst
- emnlp-ijcnlp-2019.bib
- emnlp-ijcnlp-2019.sty
- emnlp-ijcnlp-2019.tex
- emnlp-ijcnlp-2019.pdf
- images/attention_by_dataset.png
- images/attention_types.pdf
- images/attention_types.png
- images/cls_attention.pdf
- images/cosine_similarities.png
- images/disable_heads_all.pdf
- images/framenet.pdf
- images/framenet.png
- images/framenet_diagram.pdf
- images/semantic.pdf
- images/semantic_example_all.png
- images/special_tokens_attention.png
- images/disable_layers.pdf
- images/full_map_mrpc.pdf
- images/full_map_mnli.pdf
- images/full_map_qnli.pdf
- images/full_map_rte.pdf
- images/full_map_sst.pdf
- images/full_map_stsb.pdf
- images/full_map_qqp.pdf
