# Supplementary material
Source: ML conference proceedings conference paper supplement (https://aclanthology.org/D19-1445)
Supplement: Attachment [file D19-1445.Attachment.zip › images/framenet.pdf]

**Core,  
type *TEXT***

```
graph TD; A[Core, type TEXT] --> B[address]; B --> C[issues]; C --> A;
```

These are issues which future studies may seek to address.

**Core,  
type *TOPIC***
