# Supplementary material
Source: ML conference proceedings conference paper supplement (https://aclanthology.org/D19-1445)

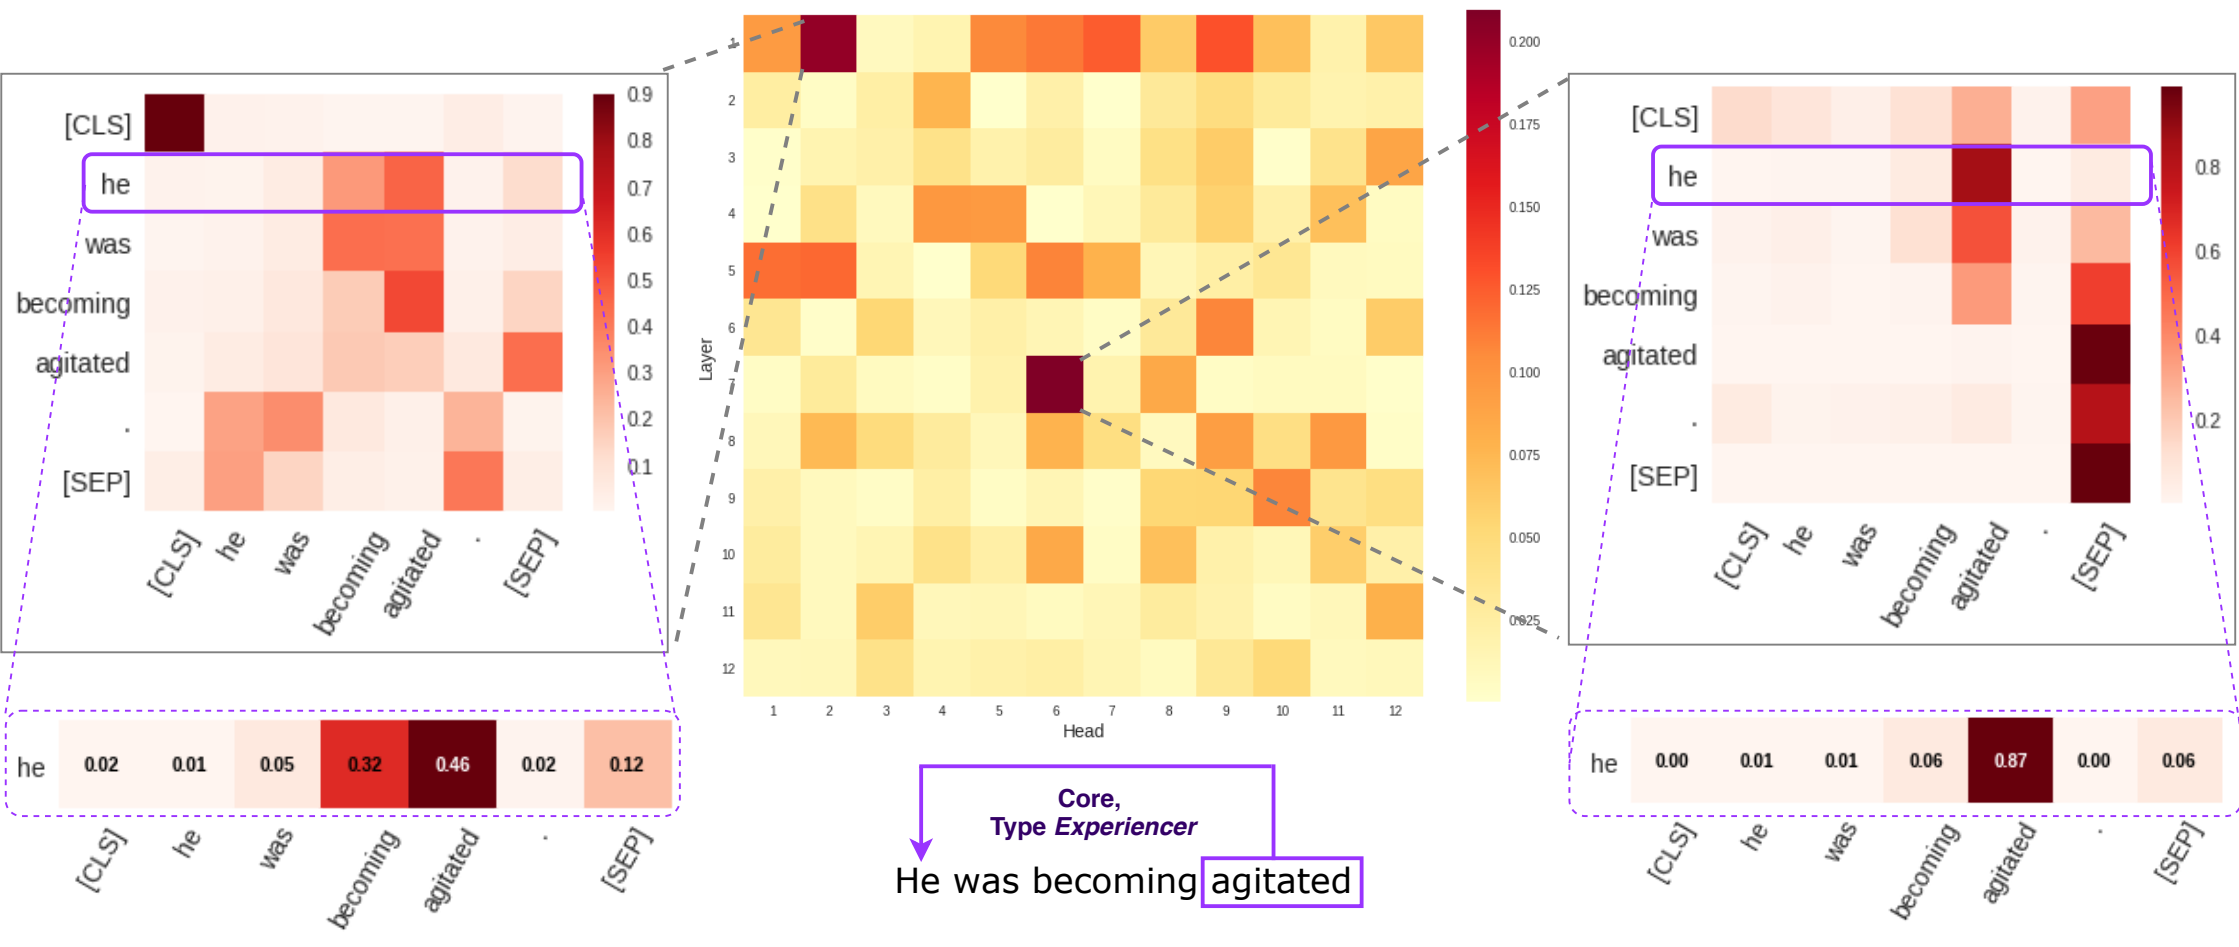

Supplement: Attachment [file D19-1445.Attachment.zip]

# RTE

Layers

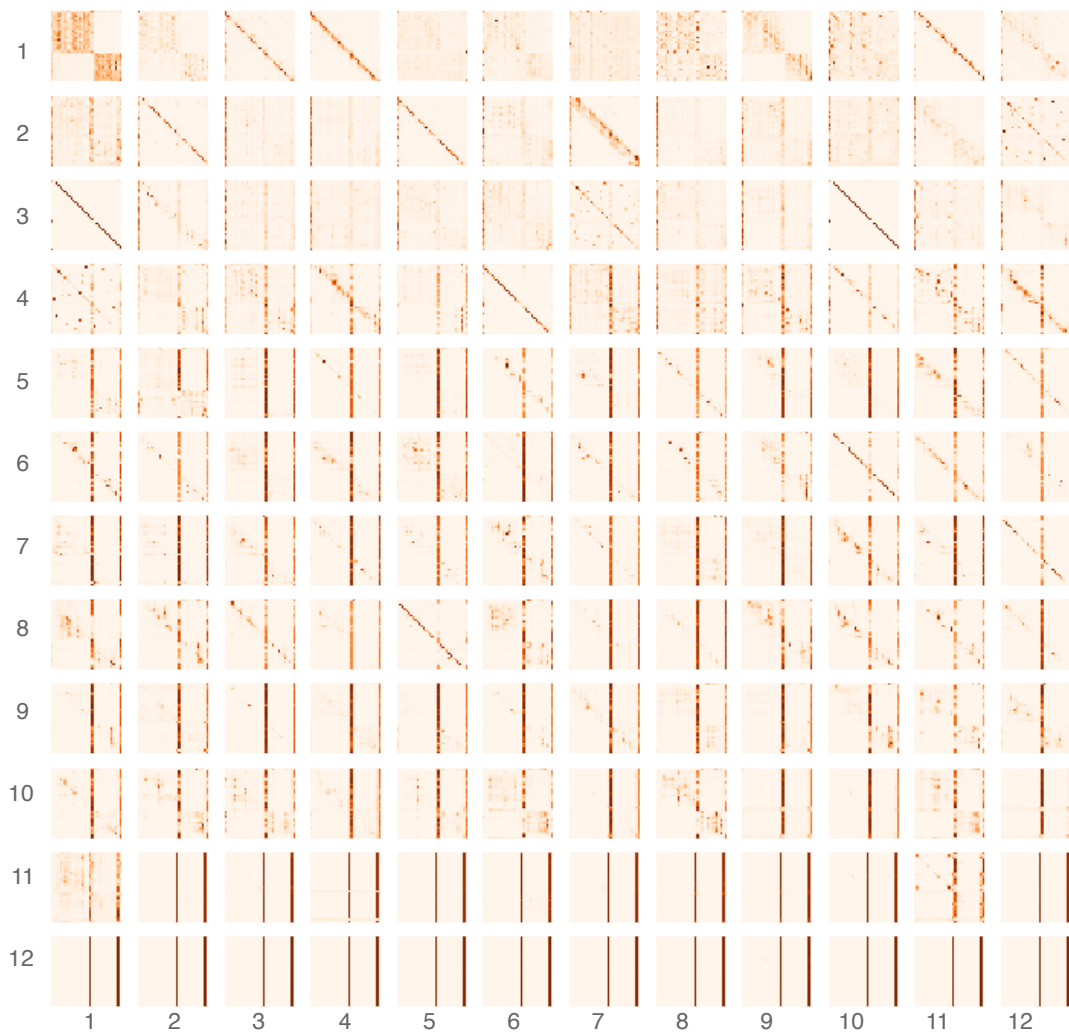

Heads

Supplement: Attachment [file D19-1445.Attachment.zip]

# MRPC

Layers

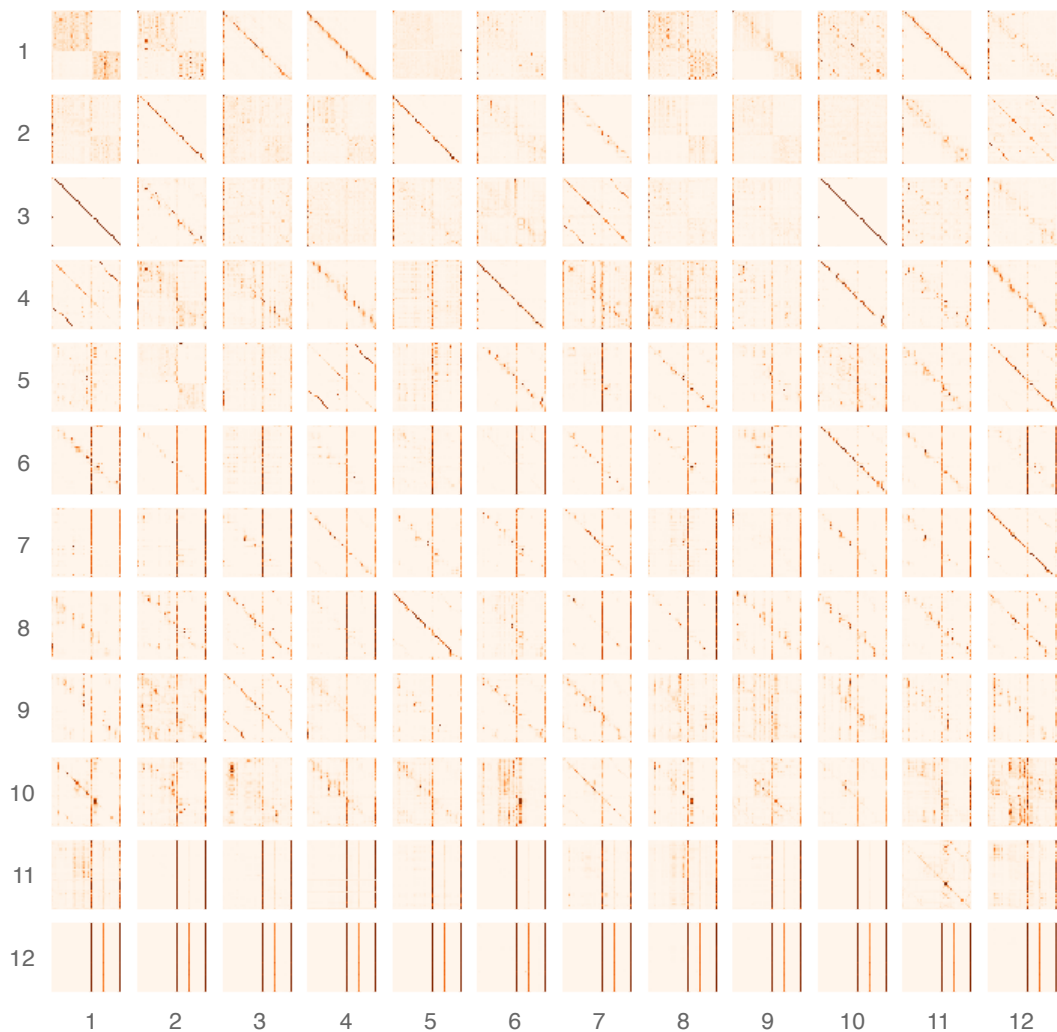

Heads

Supplement: Attachment [file D19-1445.Attachment.zip]

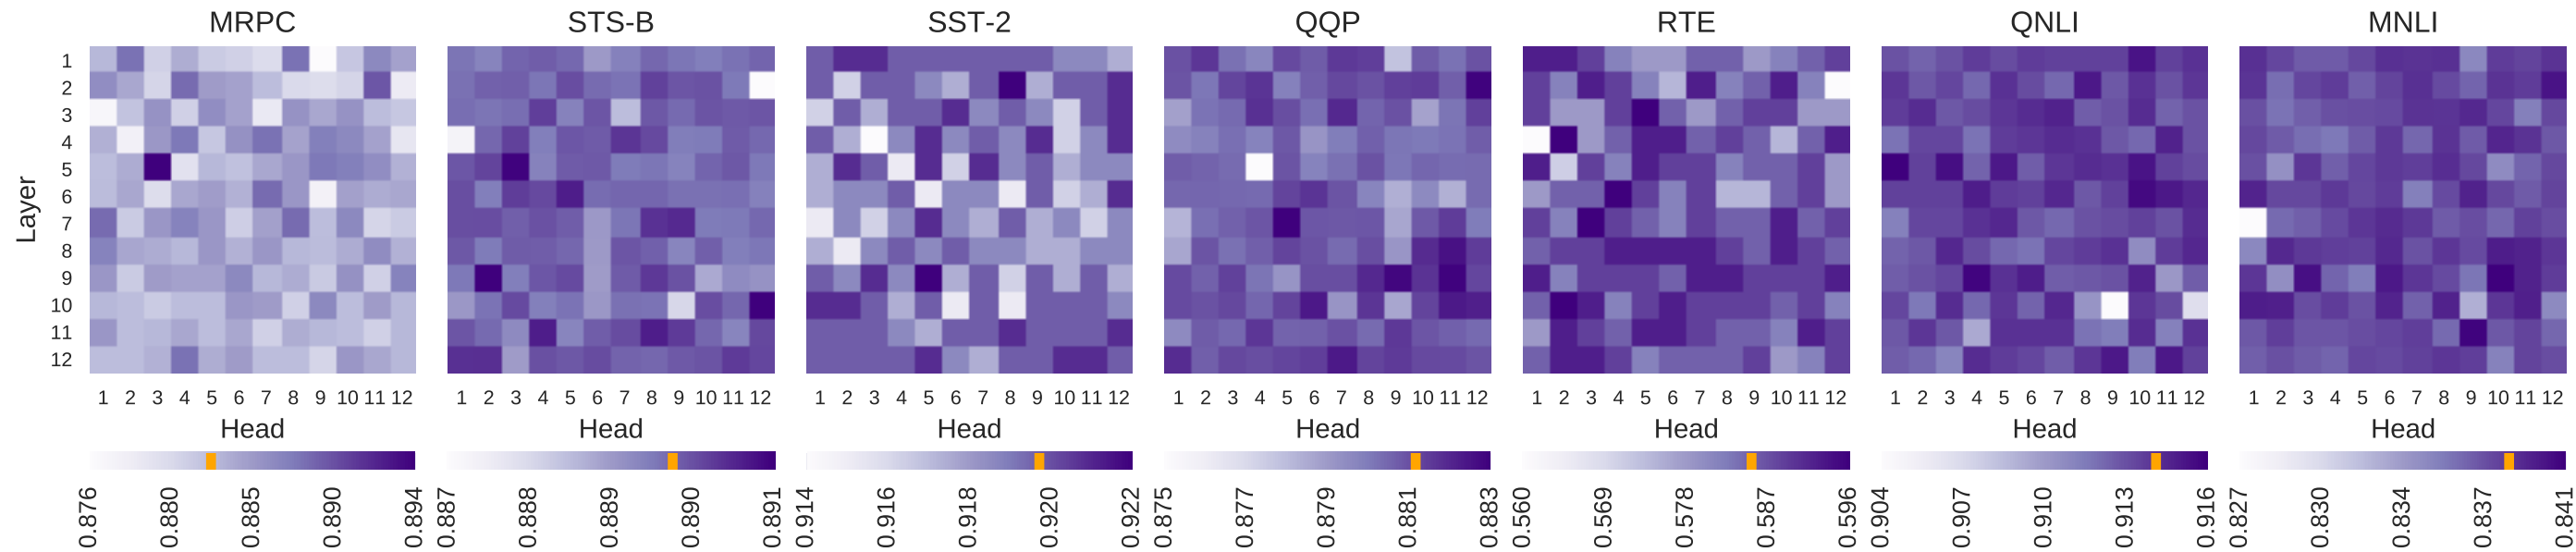

Supplement: Attachment [file D19-1445.Attachment.zip]

# SST-2

Layers

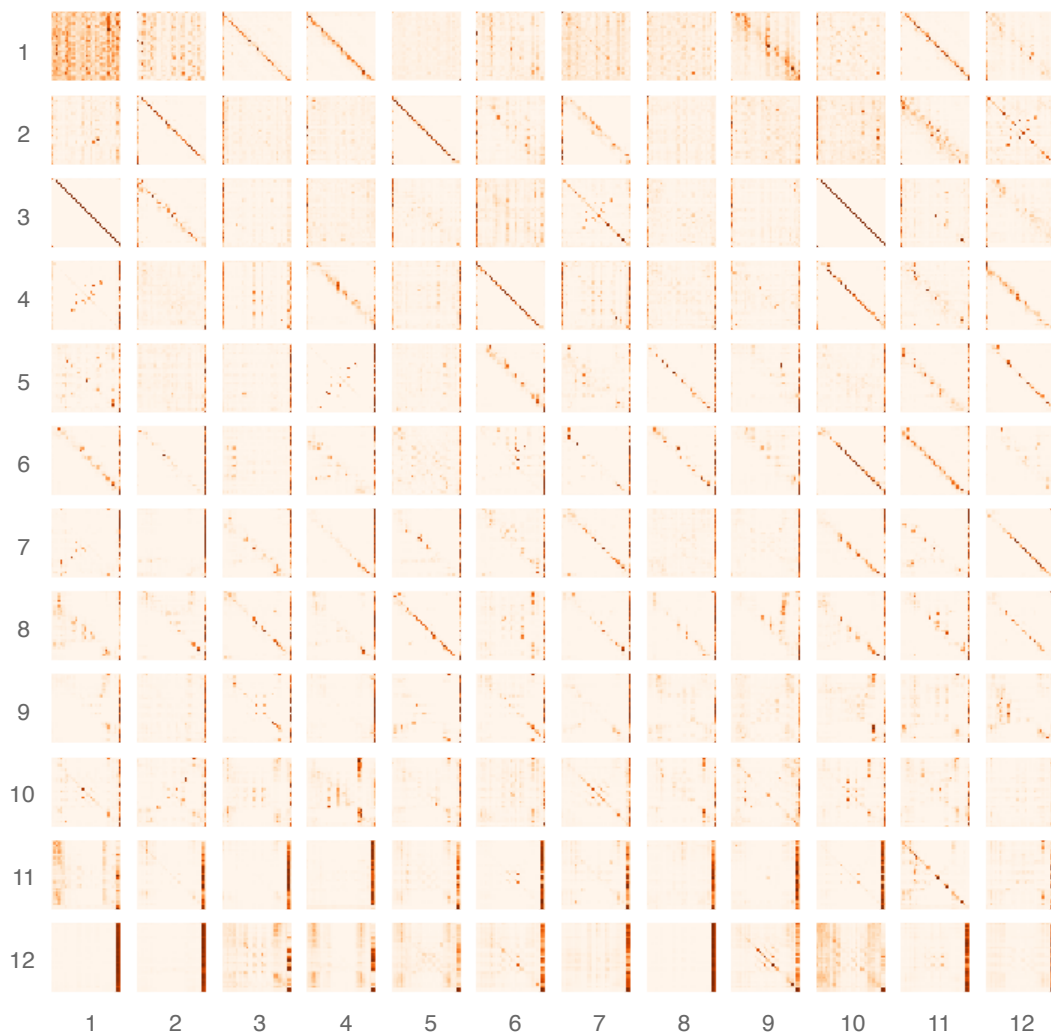

Heads

Supplement: Attachment [file D19-1445.Attachment.zip]

# QNLI

Layers

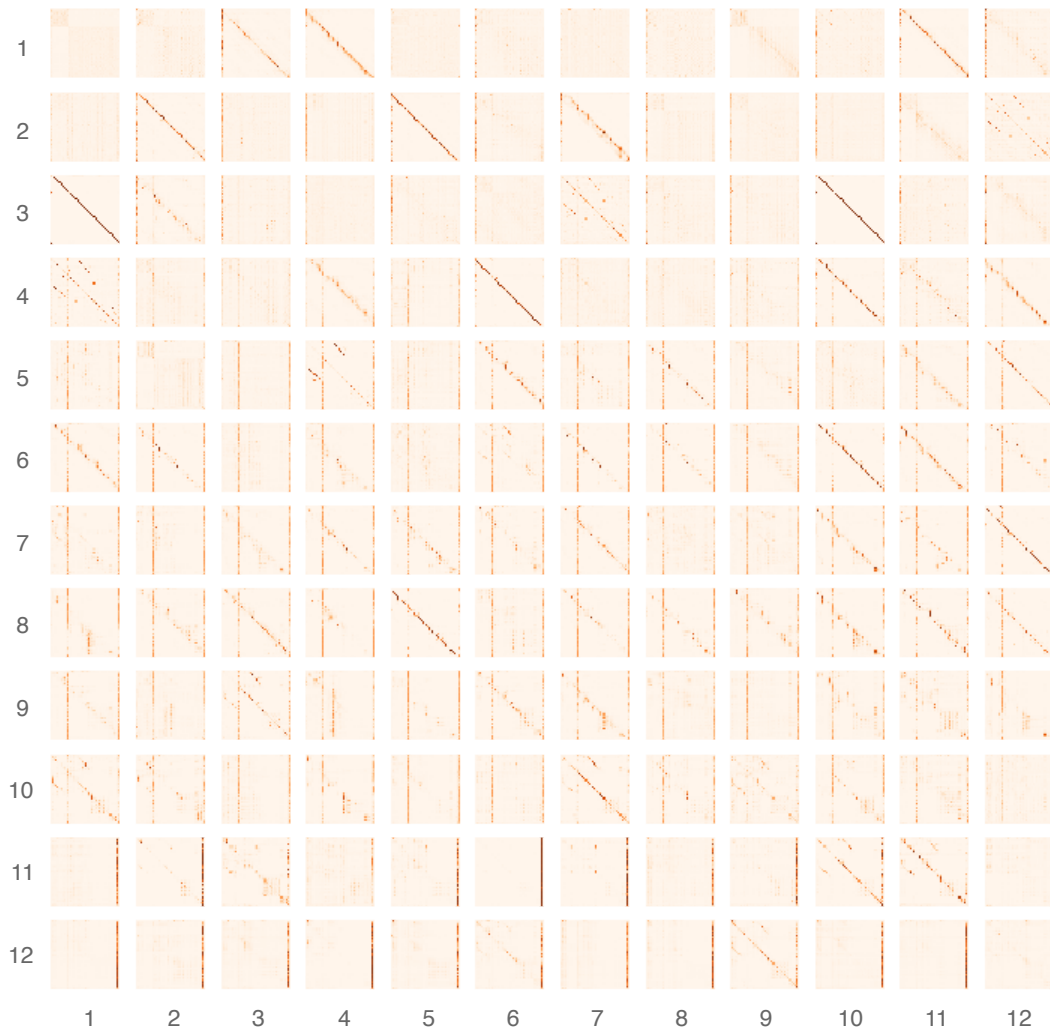

Heads

Supplement: Attachment [file D19-1445.Attachment.zip]

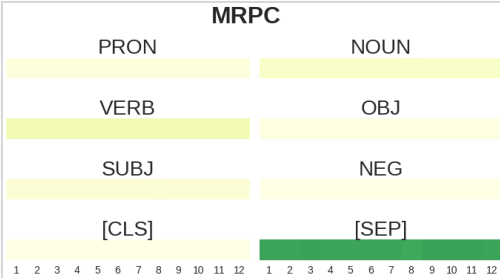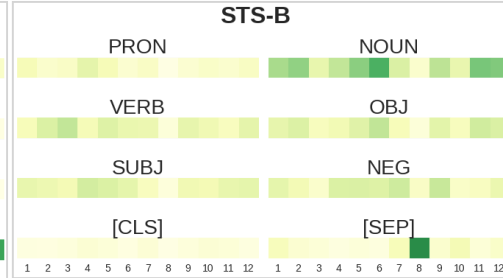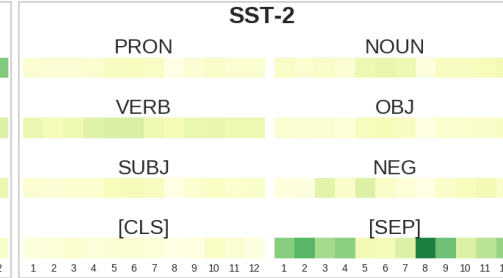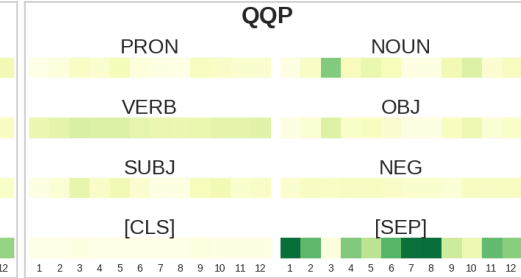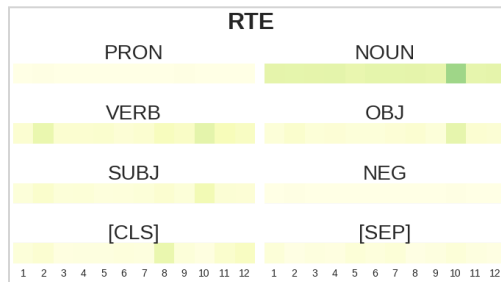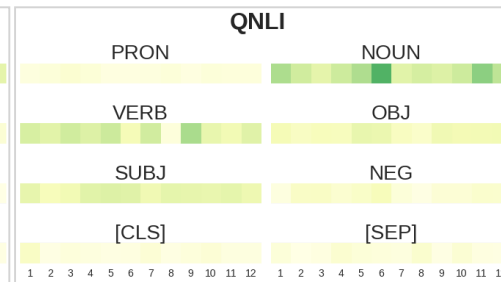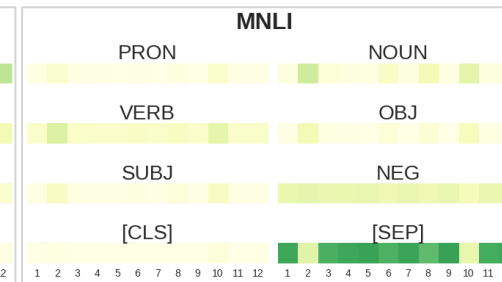

Supplement: Attachment [file D19-1445.Attachment.zip]

# MNLI

Layers

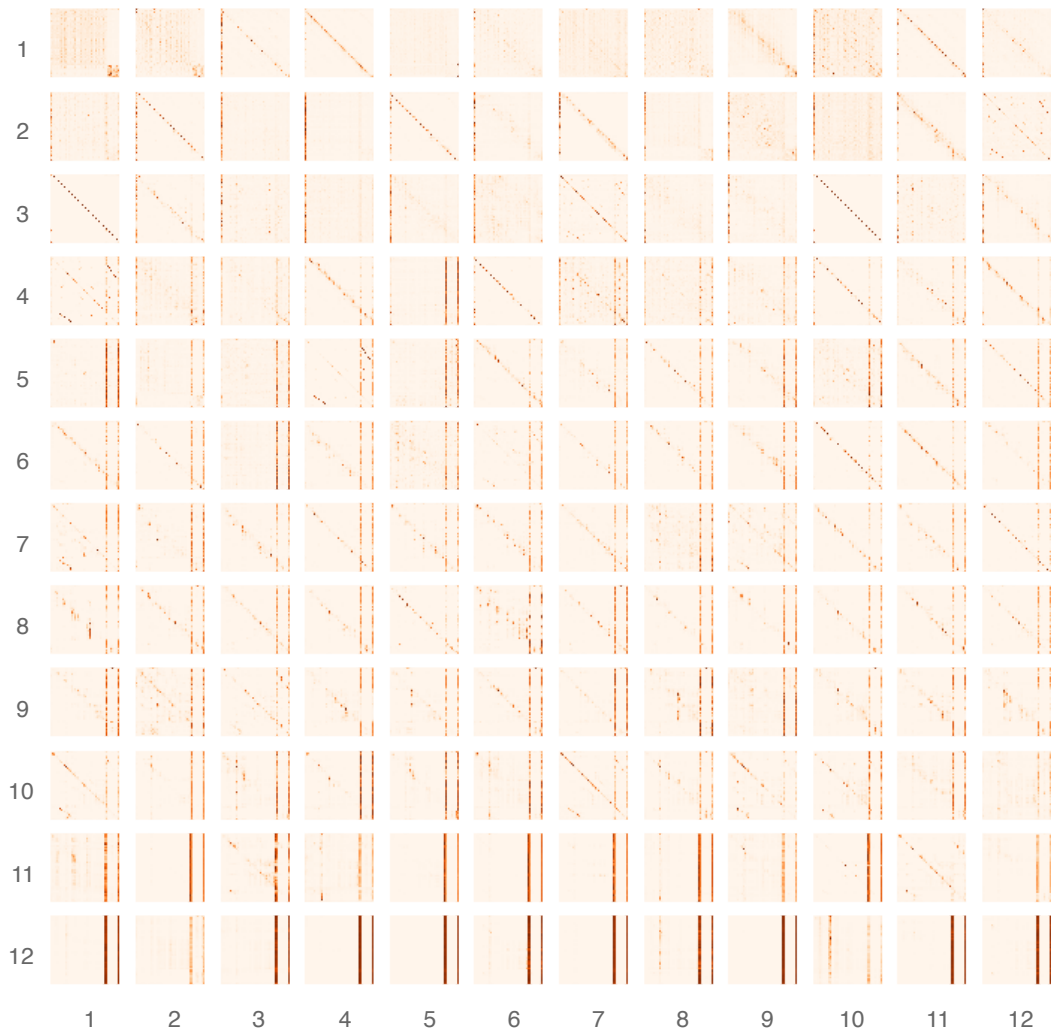

Heads

Supplement: Attachment [file D19-1445.Attachment.zip]

## STS-B

Layers

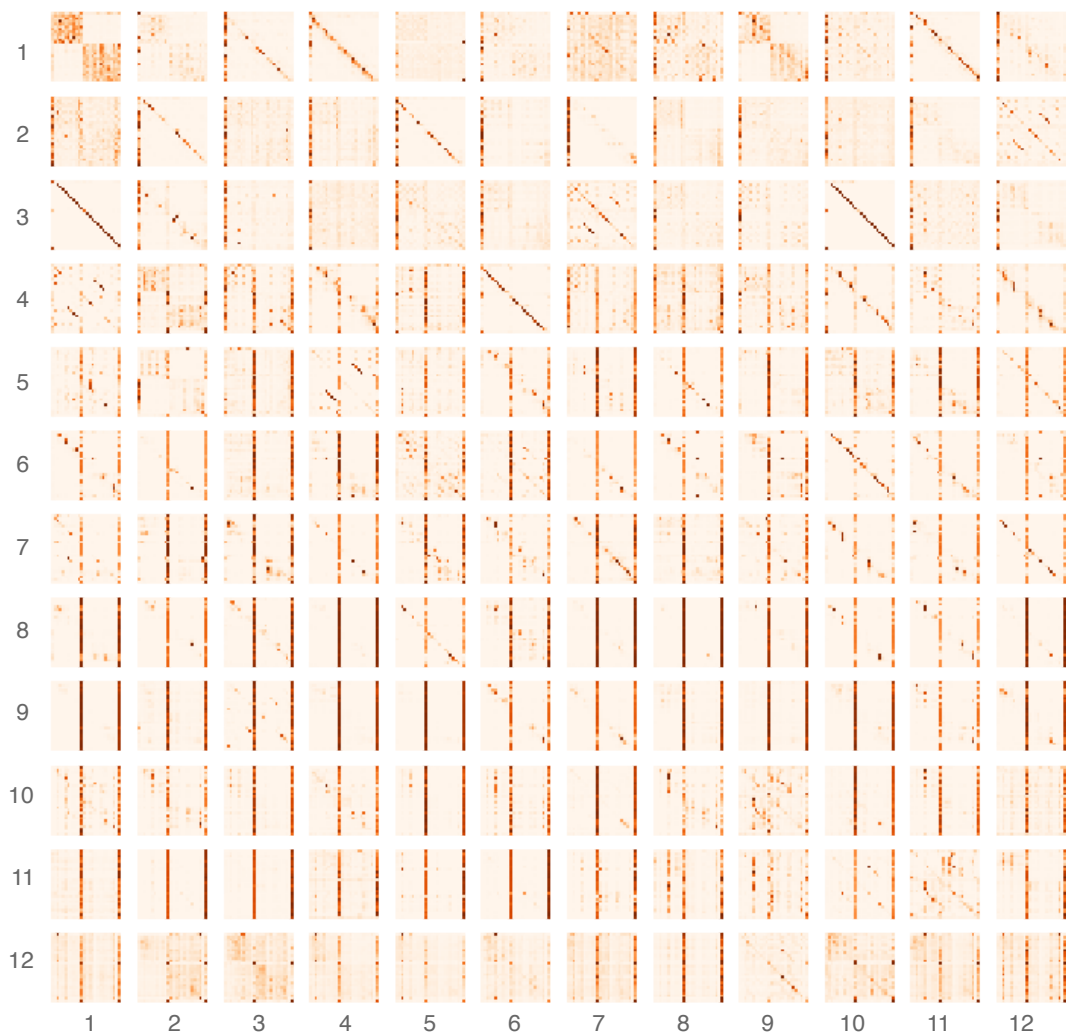

Supplement: Attachment [file D19-1445.Attachment.zip]

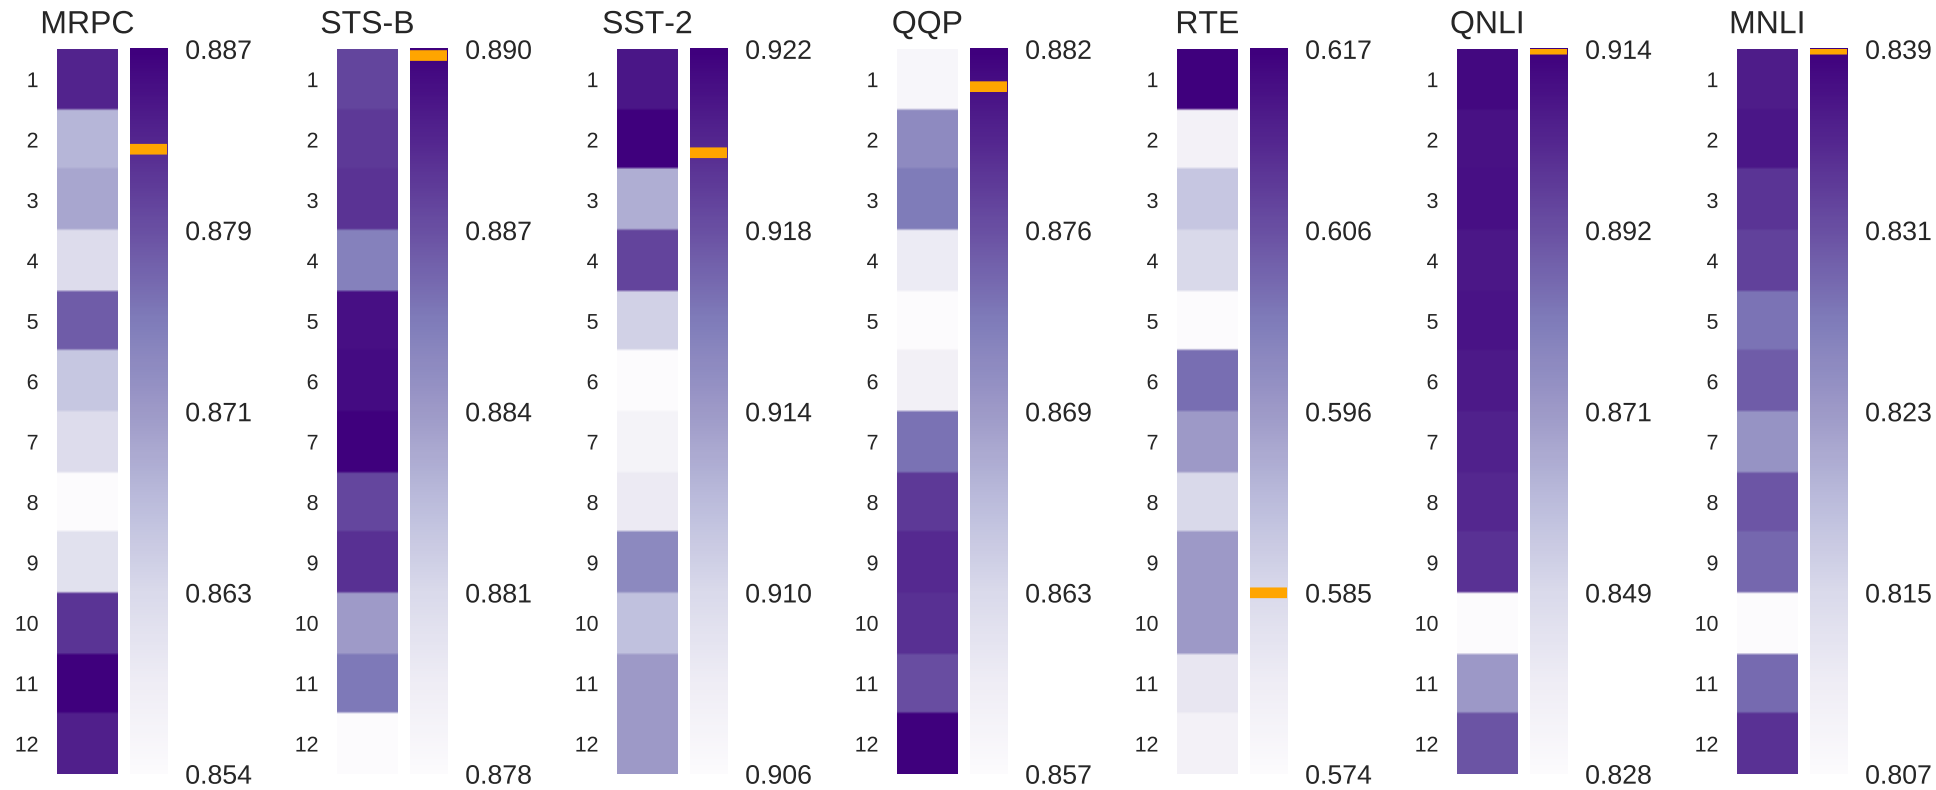

Supplement: Attachment [file D19-1445.Attachment.zip]

# MNLI

Layers

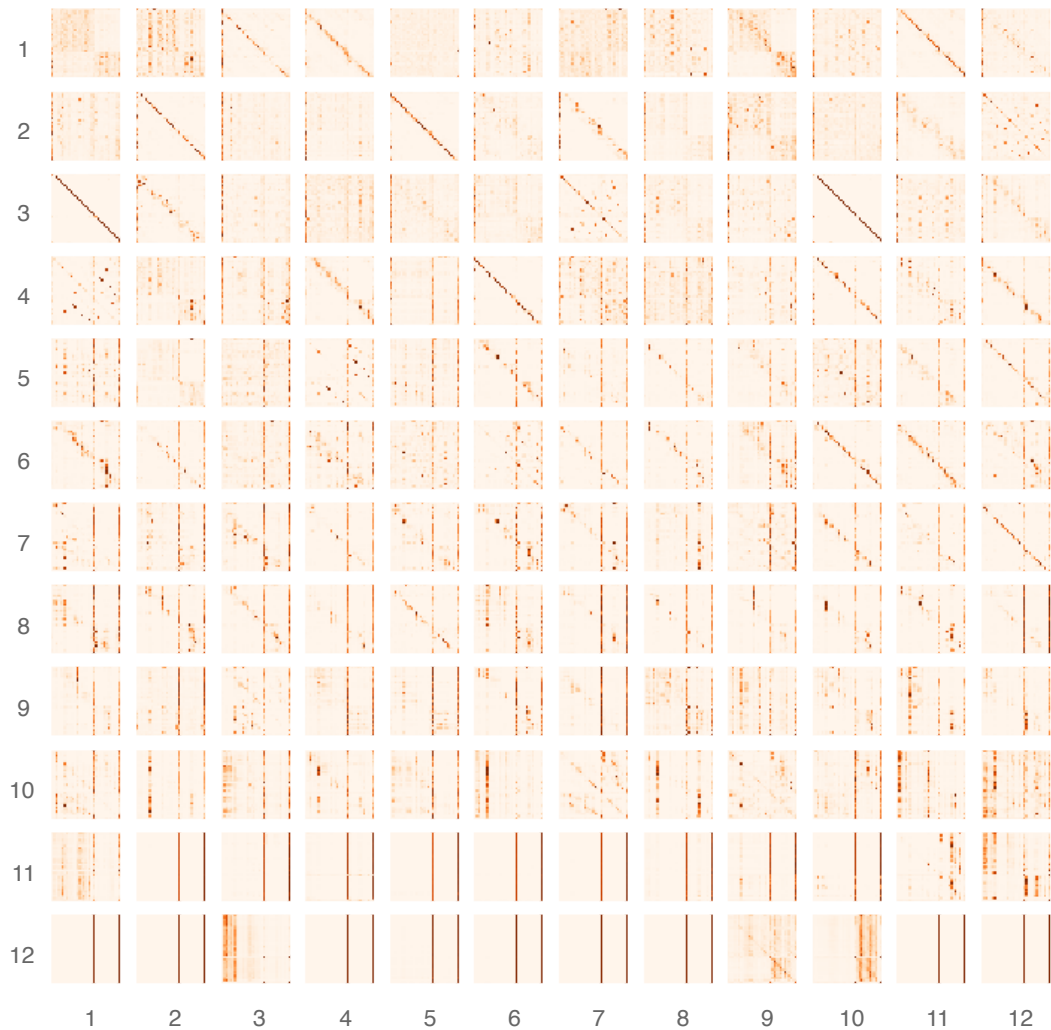

Supplement: Attachment [file D19-1445.Attachment.zip]

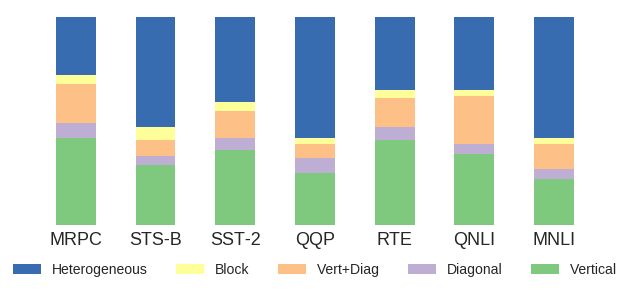

Supplement: Attachment [file D19-1445.Attachment.zip › images/attention_by_dataset.png]

Vertical

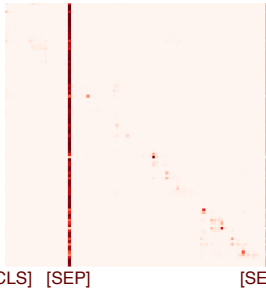

Diagonal

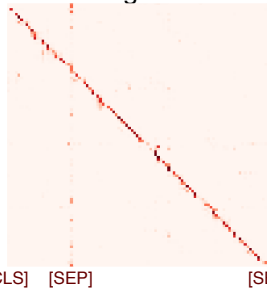

Vertical + diagonal

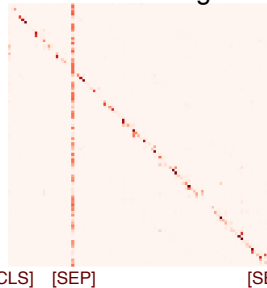

Block

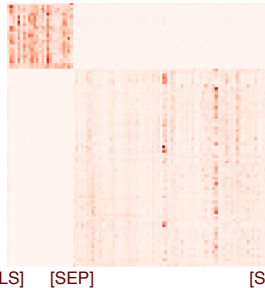

Heterogeneous

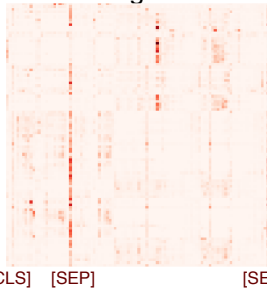

Supplement: Attachment [file D19-1445.Attachment.zip › images/attention_types.pdf]

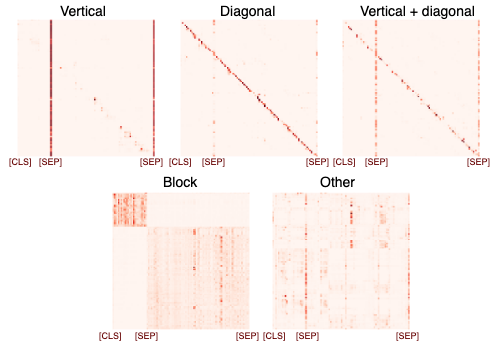

Supplement: Attachment [file D19-1445.Attachment.zip › images/attention_types.png]

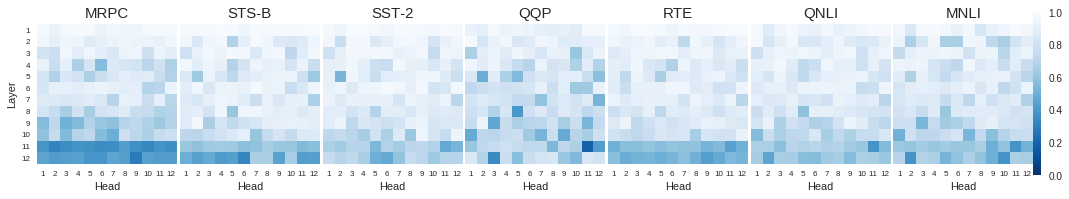

Supplement: Attachment [file D19-1445.Attachment.zip › images/cosine_similarities.png]

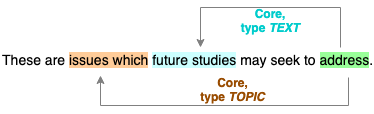

Supplement: Attachment [file D19-1445.Attachment.zip › images/framenet.png]

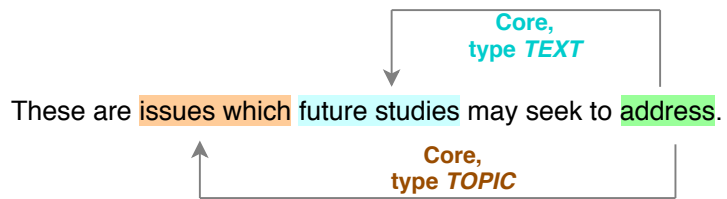

Supplement: Attachment [file D19-1445.Attachment.zip › images/framenet_diagram.pdf]

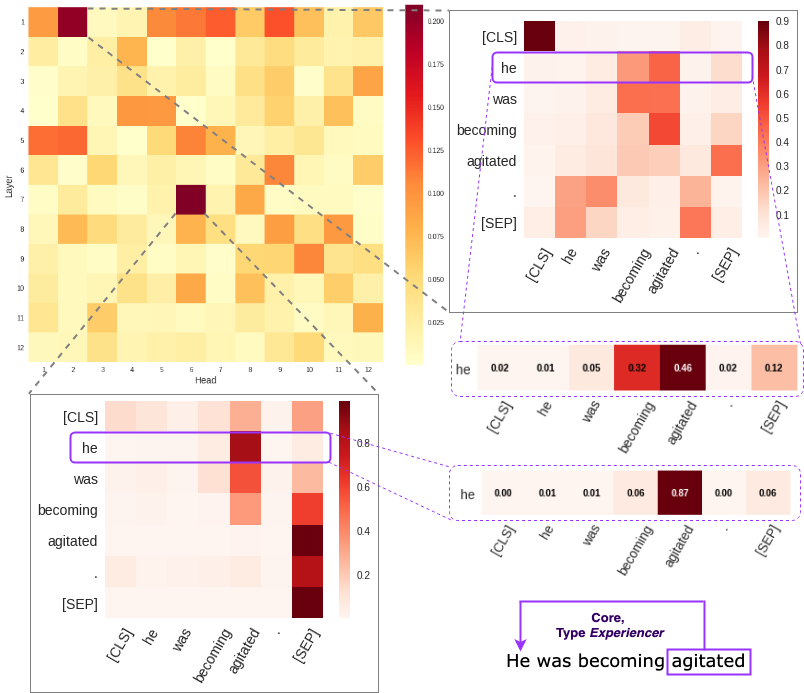

Supplement: Attachment [file D19-1445.Attachment.zip › images/semantic_example_all.png]

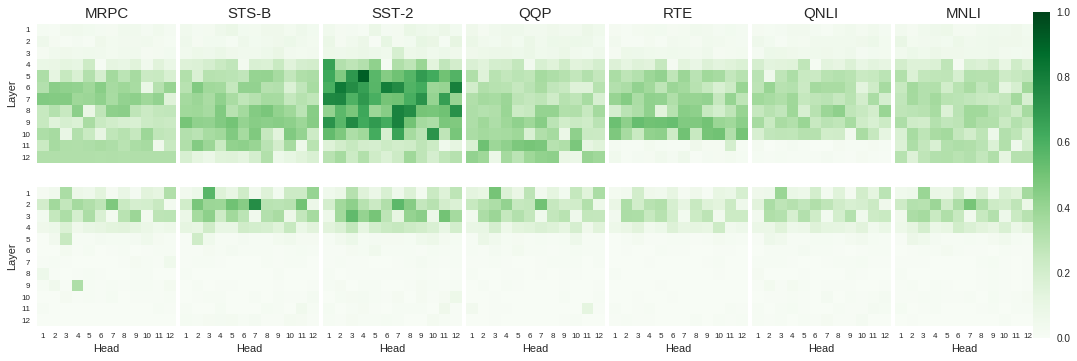

Supplement: Attachment [file D19-1445.Attachment.zip › images/special_tokens_attention.png]
